# Supplementary material for: Very-low-grade phyllosilicates in the Aravis massif (Haute-Savoie, France) and the di-trioctahedral substitution in chlorite
Source: Copernicus journal article supplement (doi:10.5194/ejm-35-831-2023), 2023-10-04
Supplement: Supplementary file 1 [file ejm-35-831-2023-supplement.pdf]

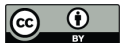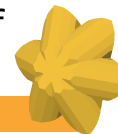

*Supplement of*

**Very-low-grade phyllosilicates in the Aravis massif (Haute-Savoie, France)  
and the di-trioctahedral substitution in chlorite**

**Benoît Dubacq et al.**

*Correspondence to:* Benoît Dubacq ([benoit.dubacq@sorbonne-universite.fr](mailto:benoit.dubacq@sorbonne-universite.fr))

The copyright of individual parts of the supplement might differ from the article licence.

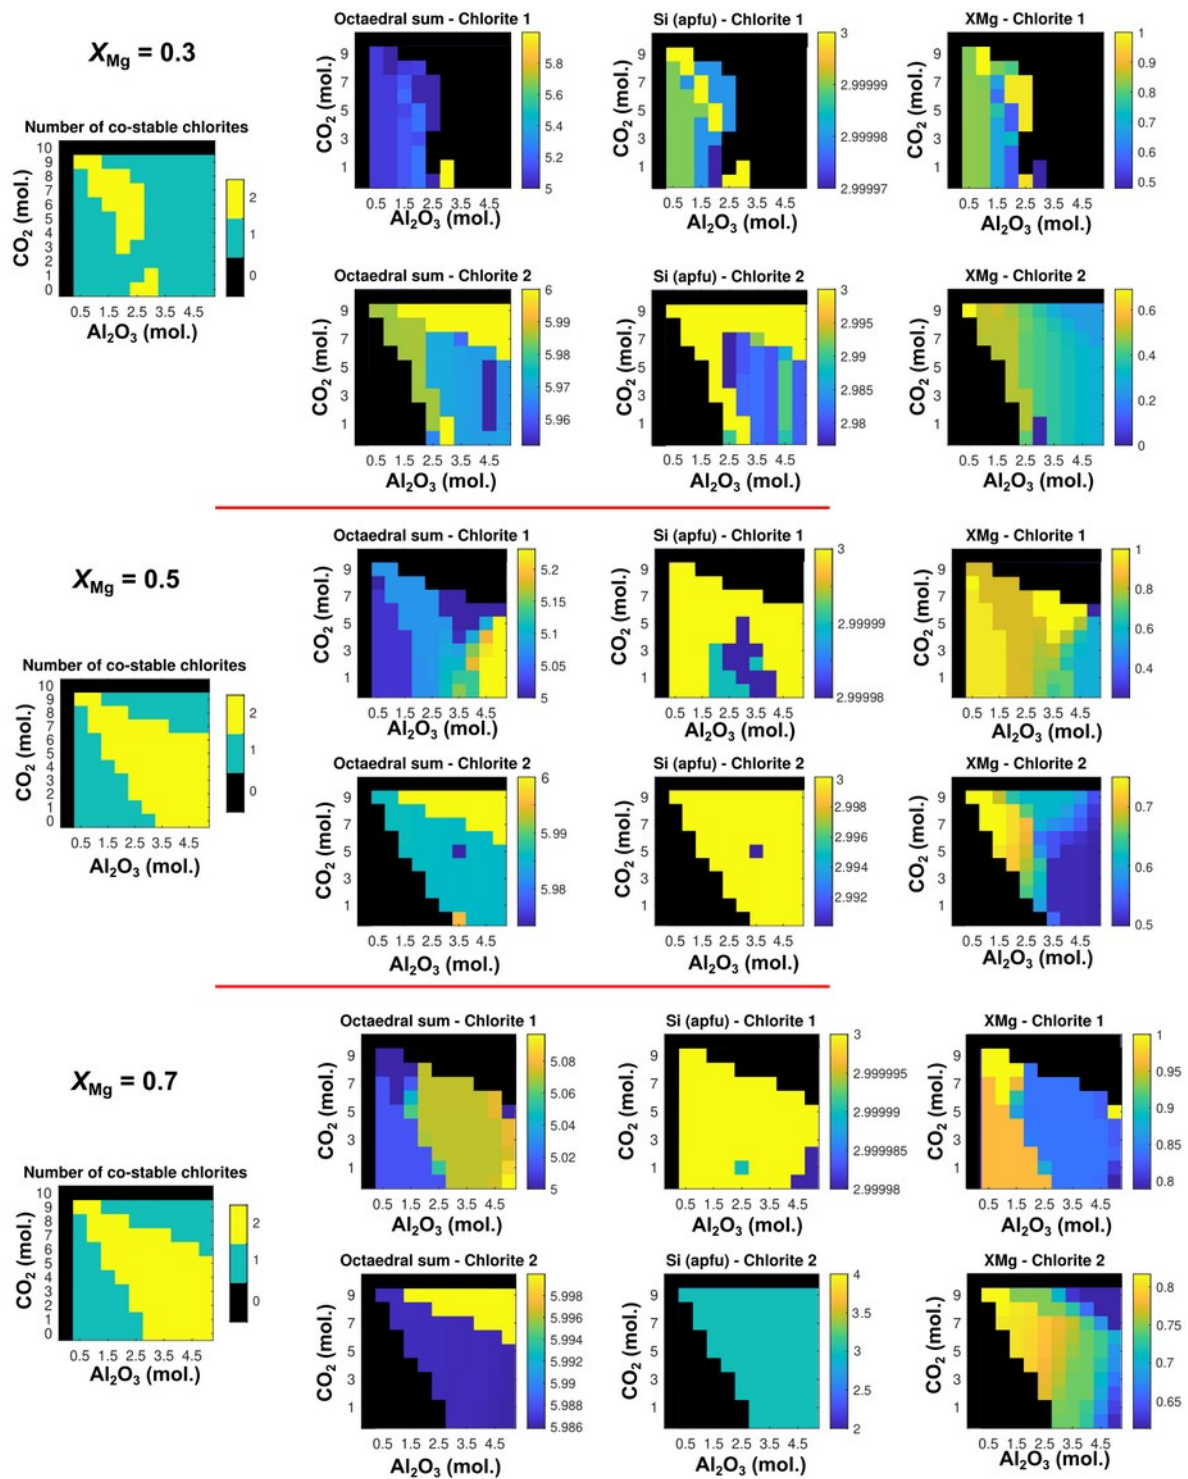

Figure S1: Results of *meemum* simulations for three distinct bulk-rock values with variable  $X_{Mg} = \text{Mg}/(\text{Mg} + \text{Fe}^{2+})$ ,  $\text{CO}_2$  and  $\text{Al}_2\text{O}_3$  molar contents. Calculations made at 200°C and 0.2 GPa. Results show the number of co-stable chlorites for each bulk-rock composition, and the sum of cations in the octahedral sites (in atoms per formula unit, apfu), Si content and  $X_{Mg}$  of dioctahedral chlorite (“Chlorite 1”) and tri-trioctahedral chlorite (“Chlorite 2”).
